# Supplementary material for: A novel poly(ethylene glycol)–grafted poly(arylene ether ketone) blend micro-porous polymer electrolyte for solid-state electric double layer capacitors formed by incorporating a chitosan-based LiClO4 gel electrolyte
Source: Royal Society of Chemistry journal article supplement (doi:10.1039/c6ta07846j), 2016-01-01
Supplement: c6ta07846j1.pdf [file c6ta07846j1.pdf]

## Supplementary information

### **A novel poly(ethylene glycol)–grafted poly(arylene ether ketone) blend micro-porous polymer electrolyte for solid-state electric double layer capacitors formed by incorporating chitosan-based LiClO<sub>4</sub> gel electrolyte**

*Ruiqi Na<sup>a</sup>, Guanze Huo<sup>b</sup>, Shuling Zhang<sup>a</sup>, Pengfei Huo<sup>c</sup>, Yinlong Du<sup>a</sup>, Jiashuang Luan<sup>a</sup>,  
Kai Zhu<sup>a</sup>, Guibin Wang<sup>a\*</sup>*

<sup>a</sup> College of Chemistry, Key Laboratory of High Performance Plastics, Ministry of Education, Jilin University, Changchun, 130012, P. R. China

<sup>b</sup> Institute of Mathematics, Jilin University, Changchun, 130012, P. R. China

<sup>c</sup> College of Material Science and Engineering, Northeast Forestry University, Harbin 150040, P. R. China

\* Corresponding author. Guibin Wang: [wgb@jlu.edu.cn](mailto:wgb@jlu.edu.cn)

## Supplementary Figures

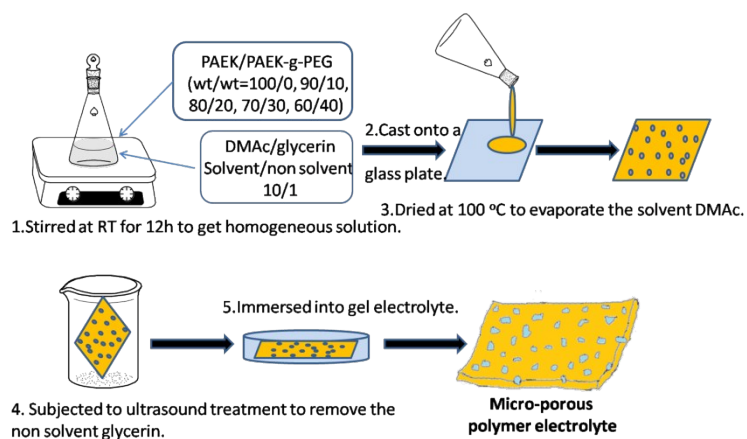

**Scheme S1** Process for synthesizing the gel micro-porous polymer electrolyte.

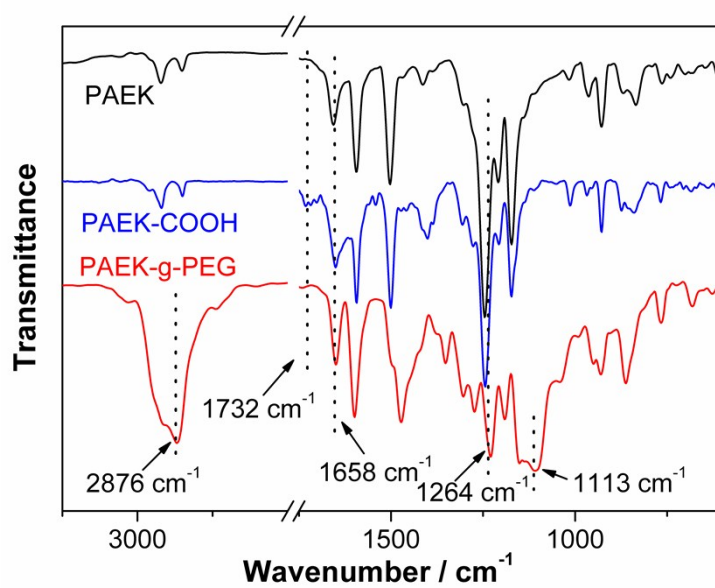

**Fig. S1** FTIR spectra of PAEK, PAEK-COOH and PAEK-g-PEG.

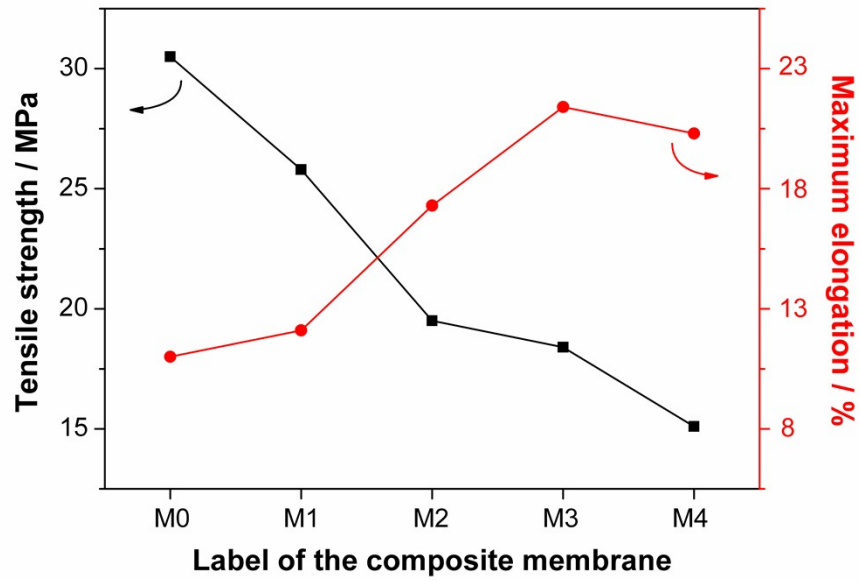

**Fig. S2** The tensile strength and maximum elongation of the composite membranes (M0, M1, M2, M3, M4).

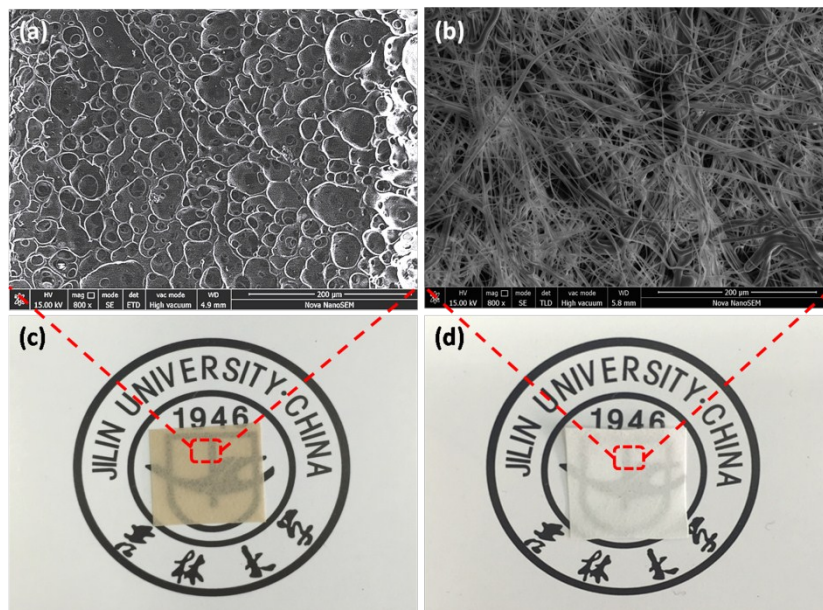

**Fig. S3** The SEM images of surface of (a) M3 and (b) commercial separator and the digital photos of (c) M3 and (d) commercial separator.

## Supplementary Table

**Table S1.** Comparison of performances S-EDLC-E2 and our laboratory previously reported EDLCs containing the same electrodes.

| Polymer electrolyte <sup>a</sup> | Specific capacitance <sup>b</sup><br>(F g <sup>-1</sup> ) | $E_{cell}$ <sup>b</sup><br>(Wh kg <sup>-1</sup> ) | $P_{cell}$ <sup>b</sup><br>(W kg <sup>-1</sup> ) | Voltage<br>(V) | Ref.      |
|----------------------------------|-----------------------------------------------------------|---------------------------------------------------|--------------------------------------------------|----------------|-----------|
| E2                               | 118.63                                                    | 7.87                                              | 95.97                                            | 1.5            | This work |
| PAES-Q-1.1 <sup>c</sup>          | 92.79                                                     | 2.61                                              | 23.20                                            | 1              | [S1]      |
| PAES-Q/PVP-40% <sup>d</sup>      | 130.29                                                    | 4.13                                              | 209.41                                           | 1              | [S2]      |
| PAEK-PEG-40% <sup>e</sup>        | 92.84                                                     | 4.90                                              | 81.63                                            | 1.5            | [S3]      |

<sup>a</sup> All the electrodes in our laboratory are activated carbon electrodes without further modification.

<sup>b</sup> Specific capacitance, energy density and power density were obtained at current density of 1 A g<sup>-1</sup> (PAES-Q-1.1 was obtained at 0.1 A g<sup>-1</sup>).

<sup>c</sup> PAES-Q-1.1 separator is prepared by quaternary ammonium functionalized poly(arylene ether sulfone)copolymer in our previous work.

<sup>d</sup> PAES-Q/ PVP-40% is prepared by quaternary ammonium functionalized poly(arylene ether sulfone)/ poly(vinylpyrrolidone) composite gel electrolyte in our previous work.

<sup>e</sup> PAEK-PEG-40% represents poly(aryl ether ketone)–poly(ethylene glycol) copolymer solid polymer electrolyte.

## Supplementary References

[S1] P.F. Huo, S.L. Zhang, X.R. Zhang, Z. Geng, J.S. Luan and G.B. Wang, *J. Membr. Sci.*, 2015, **475**, 562.

[S2] P.F. Huo, Y. Liu, R.Q. Na, X.R. Zhang, S.L. Zhang and G.B. Wang, *J. Membr. Sci.*, 2016, **505**, 148.

[S3] R.Q. Na, P.F. Huo, X.R. Zhang, S.L. Zhang, Y.L. Du, K. Zhu, Y.N. Lu, M.H. Zhang, J.S. Luan and G.B. Wang, *RSC Adv.*, 2016, **6**, 65186.
